# Supplementary material
Source: PubMed Central journal article supplement (PMC3511783)
Supplement: NIHMS422630-supplement-Supplemental_Material.pdf [file NIHMS422630-supplement-Supplemental_Material.pdf]

## Supplemental Information:

### Article title: The circadian clock modulates enamel development.

**Authors:** Rodrigo S. Lacruz\*, Joseph G. Hacia, Timothy G. Bromage, Alan Boyde, Yaping Lei, Yucheng Xu, Joseph D. Miller, Michael L. Paine, Malcolm L. Snead.

### Figure S1

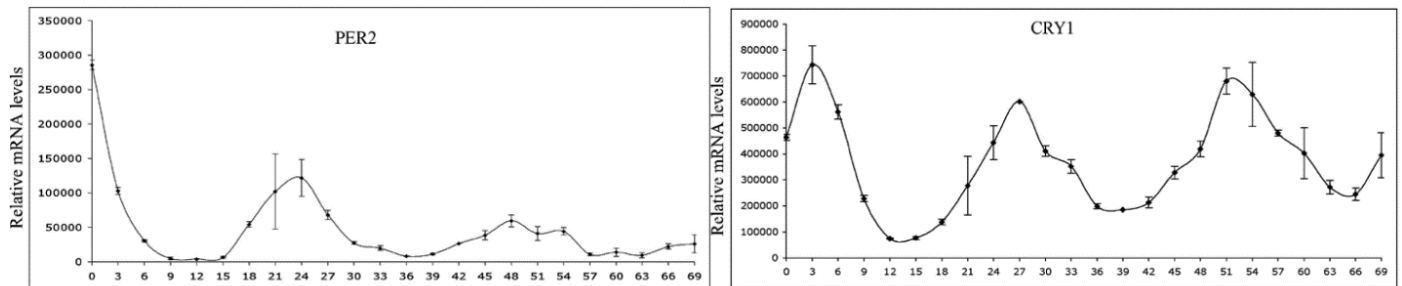

**Figure S1. Real time PCR of ameloblast cells following serum synchronization.** To characterize gene expression profiles in enamel producing cells, the ameloblast-like cell line LS8 (Chen et al., 1992) was cultured in 10mm cell culture plates grown in DMEM supplemented with 10% FBS, 5% CO<sub>2</sub> at 37°C. The circadian cycles of the cells were synchronized using a modified “serum shock” protocol based on that described by Balsalobre et al. (1998). Specifically, cells were treated for 2 hours in DMEM with a high serum concentration (50% FBS). This serum-rich media was removed and replaced with serum-free media. The synchronized cells were cultured for 72 hours and harvested at 3 hour intervals. Harvested cells were stored at -80°C until the completion of the experiment and then processed for nucleic acid extraction as follows. Homogenized synchronized cells were processed for RNA using a Qiagen RNeasy Mini kit. Reverse-transcribed PCR was performed using an iScript cDNA Synthesis kit (Bio-Rad). Real time PCR reactions were performed using iQ SYBR Green Supermix (Bio-Rad). Table S1 provides all primer sequences. Triplicate samples for each time point and for each animal were processed. All values for the mRNA species were normalized to *β-actin* using methods described in Livak and Schmittgen (2001). The expression of *Per2* and *Cry1* oscillated in phase over 72 hours, with the amplitude of the *Cry1* rhythm maintained throughout the period, whereas the *Per2* rhythm amplitude dampened. The expression of *Per2* and *Cry1* oscillated in phase over 72 hours. The expression of *Cry1* was significantly different between acrophase and bathyphase over the 72 hour period (one-way ANOVA,  $P < 0.05$ ) and although the expression of *Per2* continued to oscillate, acrophase and bathyphase were not significant after 48 hours.

**Table S1. Primer sequences used for real time PCR.**

| <b>Gene</b>    | <b>NCBI</b>    |                               |                               |                     |
|----------------|----------------|-------------------------------|-------------------------------|---------------------|
| <b>Symbol</b>  | <b>Gene ID</b> | <b>Forward Primer (5'-3')</b> | <b>Reverse Primer (5'-3')</b> | <b>Product Size</b> |
| <i>Amelx</i>   | 11704          | GGGGACCTGGATTTTGTTG           | AACCATAGGAAGGATACGGCTG        | 161 bp              |
| <i>NFYa</i>    | 18044          | GGCAGGGAATGTGGTCAAC           | TGCGGTGATACTGTTTGGC           | 146 bp              |
| <i>Per2</i>    | 18627          | AAAGCTGACGCACACAAAGAA         | ACTCCTCATTAGCCTTCACCT         | 151 bp              |
| <i>Cry1</i>    | 12952          | CACTGGTTCCGAAAGGGACTC         | CTGAAGCAAAAATCGCCACCT         | 153 bp              |
| <i>Bmal1</i>   | 11865          | ACAGTCAGATTGAAAAGAGGCG        | GCCATCCTTAGCACGGTGAG          | 124 bp              |
| <i>Car2</i>    | 12349          | GATAAAGCTGCGTCCAAGAGC         | GCATTGTCCTGAGAGTCATCAAA       | 77 bp               |
| <i>Slc4a4</i>  | 54403          | TCCGAGAACTACTCCGACAAA         | CTGCTGGACTCATCCGCATT          | 53 bp               |
| <i>Lamp1</i>   | 16783          | CAGCACTCTTTGAGGTGAAAAAC       | CCATTGCGAGTCTCGTAGGTG         | 91 bp               |
| <i>B-actin</i> | 11461          | GGGAAATCGTGCGTGACATC          | GCGGCAGTGGCCATCTC             | 76 bp               |

**Table S2. E-box elements located within 10-kb upstream of transcription start site**

| ene          | Human E-Box (5'-3')                       | Mouse E-Box (5'-3')                        | Rat E-Box (5'-3')                         |
|--------------|-------------------------------------------|--------------------------------------------|-------------------------------------------|
| <i>Amelx</i> | -5349 to -5344<br>cctattgaaacgtgcaactcag  | -9306 to -9301<br>tattcaatcacgttatgccttc   | None                                      |
| <i>Ambn</i>  | -4497 to -4492<br>tttgtgacaacgtggatgaacc  | None                                       | -5145 to -5139<br>ttctcttacacgtttcaataat  |
|              | -5654 to -5649<br>tcccatgacacgtgggaatat   |                                            | -7222 to -7217<br>tagtggagcacgtgtctctttt  |
|              | -7739 to -7734<br>gaaggggtccacgtgtgaaaagc |                                            | -----                                     |
| <i>Enam</i>  | -3258 to -3253<br>attacaggcacgtgccaccaag  | None                                       | None                                      |
| <i>Mmp20</i> | -44 to -39<br>gaagtgcacacgtgcaactgtct     | -577 to -572<br>aatccaaccacgttcaaatacat    | -1157 to -1152<br>gccttgatcacgtgtgctgtctt |
|              | -7211 to -7206<br>ttgatggacacgttgggttgatt | -3636 to -3631<br>ctttttaacacgtgatcatgta   | -1402 to -1397<br>cgagtttgacgtgaggaggag   |
|              | -7312 to -7307<br>gttccatccacgttgtggcaaa  | -8760 to -8755<br>atgtaattcacgtgattcagta   | -2246 to -2241<br>ctgggactcacgtgatggaagg  |
|              | -----                                     | -9447 to -9442<br>ttagagggtcacgtgggggtgggg | -5691 to -5686<br>gggaggagcacgttctaattac  |
|              | -----                                     | -----                                      | -6669 to -6664<br>gctatgtgcacgtttcctaccc  |
| <i>Nfya</i>  | -1839 to -1834<br>ccaaaactcacgttgatttaaa  | -1439 to -1434<br>tgatctaaaacgtgcaaaggaa   | -1714 to -1709<br>tcagaactcacgttgacttaac  |
|              | -9889 to -9884<br>ttcatagacacgtttaggaaat  | -1591 to -1586<br>tggaaactcacgttgacttaac   | -3661 to -3656<br>tgatacccacgtggatgcaat   |
|              | -----                                     | -----                                      | -4663 to -4658<br>taagaccccacgtggcaggtta  |
|              | -----                                     | -----                                      | -7544 to -7539<br>gctgtgttaacgtgcagtacca  |
|              | -----                                     | -----                                      | -9209 to -9204<br>acaagaaaaacgtgtgatgtgg  |
|              | -----                                     | -----                                      | -9427 to -9422<br>ctctcagtaacgtgctgttttc  |

Note: Transcription start sites are based on RefSeq sequences listed in the Methods section. E-box elements are highlighted in gray along with 8 base pairs of flanking sequence on either side.

**Table S3. Percentage of filtered RefSeq records containing specific numbers of E-box elements 10-kb upstream of transcription start sites.**

| Number of elements | Human RefSeq Records <sup>a</sup>          |                                            |                                            |
|--------------------|--------------------------------------------|--------------------------------------------|--------------------------------------------|
|                    | 5'-CACGTG-3' considered alone <sup>b</sup> | 5'-CACGTT-3' considered alone <sup>c</sup> | 5'-CACGTG-3' and 5'-CACGTT-3' <sup>d</sup> |
| 0                  | 33.62%                                     | 26.0%                                      | 9.46%                                      |
| 1                  | 33.18%                                     | 33.6%                                      | 19.99%                                     |
| 2                  | 19.18%                                     | 23.2%                                      | 23.83%                                     |
| 3                  | 8.32%                                      | 11.0%                                      | 19.51%                                     |
| 4                  | 3.49%                                      | 4.3%                                       | 12.75%                                     |
| 5                  | 1.32%                                      | 1.4%                                       | 7.09%                                      |
| 6                  | 0.4%                                       | 0.4%                                       | 3.9%                                       |
| 7                  | 0.2%                                       | 0.1%                                       | 1.7%                                       |
| 8                  | 0.1%                                       | 0.1%                                       | 0.8%                                       |
| 9                  | 0.1%                                       | 0.0%                                       | 0.4%                                       |
| 10                 | 0.0%                                       | 0.0%                                       | 0.2%                                       |
| >10                | 0.0%                                       | 0.0%                                       | 0.3%                                       |

| Number of elements | Mouse RefSeq Records <sup>a</sup>          |                                            |                                            |
|--------------------|--------------------------------------------|--------------------------------------------|--------------------------------------------|
|                    | 5'-CACGTG-3' considered alone <sup>b</sup> | 5'-CACGTT-3' considered alone <sup>c</sup> | 5'-CACGTG-3' and 5'-CACGTT-3' <sup>d</sup> |
| 0                  | 32.4%                                      | 30.1%                                      | 10.7%                                      |
| 1                  | 33.4%                                      | 34.5%                                      | 21.6%                                      |
| 2                  | 19.6%                                      | 21.0%                                      | 23.1%                                      |
| 3                  | 8.9%                                       | 9.6%                                       | 18.8%                                      |
| 4                  | 3.7%                                       | 3.3%                                       | 12.4%                                      |
| 5                  | 1.4%                                       | 1.1%                                       | 7.2%                                       |
| 6                  | 0.4%                                       | 0.3%                                       | 3.4%                                       |
| 7                  | 0.1%                                       | 0.0%                                       | 1.6%                                       |
| 8                  | 0.1%                                       | 0.0%                                       | 0.7%                                       |
| 9                  | 0.0%                                       | 0.0%                                       | 0.3%                                       |
| 10                 | 0.0%                                       | 0.0%                                       | 0.1%                                       |
| >10                | 0.0%                                       | 0.0%                                       | 0.1%                                       |

| Number of elements | Rat RefSeq Records <sup>a</sup>            |                                            |                                            |
|--------------------|--------------------------------------------|--------------------------------------------|--------------------------------------------|
|                    | 5'-CACGTG-3' considered alone <sup>b</sup> | 5'-CACGTT-3' considered alone <sup>c</sup> | 5'-CACGTG-3' and 5'-CACGTT-3' <sup>d</sup> |
| 0                  | 31.1%                                      | 28.1%                                      | 10.2%                                      |
| 1                  | 32.8%                                      | 32.7%                                      | 19.3%                                      |
| 2                  | 20.2%                                      | 22.2%                                      | 22.6%                                      |
| 3                  | 9.7%                                       | 10.8%                                      | 18.8%                                      |
| 4                  | 3.8%                                       | 4.2%                                       | 13.0%                                      |
| 5                  | 1.6%                                       | 1.4%                                       | 8.3%                                       |
| 6                  | 0.4%                                       | 0.4%                                       | 4.1%                                       |
| 7                  | 0.2%                                       | 0.1%                                       | 2.0%                                       |
| 8                  | 0.1%                                       | 0.0%                                       | 0.9%                                       |
| 9                  | 0.0%                                       | 0.0%                                       | 0.4%                                       |
| 10                 | 0.0%                                       | 0.0%                                       | 0.2%                                       |
| >10                | 0.0%                                       | 0.0%                                       | 0.1%                                       |

<sup>a</sup>The percentage of filtered RefSeq records containing the specified number of E-box elements 10-kb upstream of the transcription start site are provided. Both strands are considered in all cases. <sup>b</sup>Only considers 5'-CACGTG-3' elements. <sup>c</sup>Only considers 5'-CACGTT-3' elements. <sup>d</sup>Considers the sum of the number of 5'-CACGTG-3' and 5'-CACGTT-3' elements.
